# Supplementary material for: Single-Pair Courtship and Competition Assays inDrosophila
Source: HighWire-hosted journal article supplement (doi:10.1101/pdb.prot108105), 2023-02-13
Supplement: Supplemental_File_15-03-22_CM.docx [file Supplemental_File_15-03-22_CM.docx]

**Supplemental Figure 1.** Schematic illustration round courtship arena. A. opened state which is used to separately load male and female flies. B. Closed state used to test courtship.

**Supplemental Figure 2.** Schematic illustration of courtship arena dimensions. A. Entire arena. B. External layers. C. Internal layers.

**Supplemental Figure 4.** Schematic illustration of courtship arena dimensions.

**Supplemental Figure 3.** Schematic illustration of courtship arena.

**Supplemental Figure 5.** Schematic illustration of courtship arena.

**Supplemental Figure 6.** Schematic illustration of courtship arena dimensions. A. Middle layers. B. Sliding parts used to insert males and females separately. C. Adaptor part.
